**Genome Biology**

(submitted)

1  
2  
3  
4  
5  
6  
7  
8  
9  
10  
11  
12  
13  
14  
15  
16  
17  
18  
19  
20  
21  
22  
23  
24  
25  
26  
27  
28

**Power and pitfalls of computational methods for inferring clone phylogenies and mutation orders from bulk sequencing data**

Sayaka Miura<sup>1,2</sup>, Tracy Vu<sup>1,2</sup>, Jiamin Deng<sup>1,2</sup>, Tiffany Buturla<sup>1,2</sup>, Jiyeong Choi<sup>1,2</sup>, and Sudhir Kumar<sup>1,2,3\*</sup>

<sup>1</sup>Institute for Genomics and Evolutionary Medicine, <sup>2</sup>Department of Biology, Temple University, Philadelphia, PA 19122, USA.<sup>3</sup>Center for Excellence in Genome Medicine and Research, King Abdulaziz University, Saudi Arabia.

SM: [tuf78332@templ.edu](mailto:tuf78332@templ.edu)  
TV: [tug86468@temple.edu](mailto:tug86468@temple.edu)  
JD: [tug64096@temple.edu](mailto:tug64096@temple.edu)  
TB: [tug42548@temple.edu](mailto:tug42548@temple.edu)  
JC: [tuh48344@temple.edu](mailto:tuh48344@temple.edu)

\*Correspondence to:  
Sudhir Kumar  
Temple University  
Philadelphia, PA 19122, USA  
E-mail: [s.kumar@temple.edu](mailto:s.kumar@temple.edu)

29 **Abstract**

30 **Background.** Tumors harbor extensive genetic heterogeneity in the form of distinct clone  
31 genotypes that arise over time and across different tissues and regions of a cancer patient. Many  
32 computational methods produce clone phylogenies from population bulk sequencing data  
33 collected from multiple tumor samples. These clone phylogenies are used to infer mutation order  
34 and clone origin times during tumor progression, rendering the selection of the appropriate clonal  
35 deconvolution method quite critical. Surprisingly, absolute and relative accuracies of these  
36 methods in correctly inferring clone phylogenies have not been consistently assessed.

37 **Methods.** We evaluated the performance of seven computational methods in producing clone  
38 phylogenies for simulated datasets in which clones were sampled from multiple sectors of a  
39 primary tumor (multi-region) or primary and metastatic tumors in a patient (multi-site). We  
40 assessed the accuracy of tested methods metrics in determining the order of mutations and the  
41 branching pattern within the reconstructed clone phylogenies.

42 **Results.** The accuracy of the reconstructed mutation order varied extensively among methods  
43 (9% – 44% error). Methods also varied significantly in reconstructing the topologies of clone  
44 phylogenies, as 24% – 58% of the inferred clone groupings were incorrect. All the tested methods  
45 showed limited ability to identify ancestral clone sequences present in tumor samples correctly.  
46 The occurrence of multiple seeding events among tumor sites during metastatic tumor evolution  
47 hindered deconvolution of clones for all tested methods.

48 **Conclusions.** Overall, CloneFinder, MACHINA, and LICHeE showed the highest overall  
49 accuracy, but none of the methods performed well for all simulated datasets and conditions.

50

51 **Keywords:** Clone phylogeny; bulk sequencing; tumor evolution; mutation order

## 52 **Background**

53 Somatic mutations play a crucial role in cancer progression [1-3]. Early models proposed that  
54 clones with driver mutations sweep through the population, which is called a linear progression of  
55 clone evolution [4]. Now, it is clear that tumors are not monoclonal, and that the clonal evolution  
56 generally follows a branching model (i.e., incomplete clonal sweep) even within a tumor [4-10].  
57 Similarly, metastatic tumors also follow a branching pattern [11, 12]. Clones found in primary and  
58 metastatic tumors show inter- and intra-tumor evolutionary relationships, which can be  
59 represented by a single-patient clone phylogeny [13-16] (e.g., **Fig. 1g and 1h**). The reconstruction  
60 and analysis of clone phylogenies have become standard practices in cancer genomics [16-26].

61 Clone phylogenies are most often inferred using bulk sequencing data [16, 27-30]. Bulk  
62 sequencing of tumor samples is cost effective and can accurately identify single nucleotide  
63 variants (SNVs) [31, 32]. The resulting data contains SNV frequencies of cancer cell populations  
64 within each tumor sample [27, 33]. Several computational methods have been developed to  
65 decompose these SNV profiles into individual clone genotypes, and to predict clone phylogenies  
66 [13, 34-39]. These clone genotypes and phylogenies are then employed to infer relative ordering  
67 of somatic mutations and to build migration maps of metastatic tumors [40, 41].

68 Computational methods for clone prediction and phylogeny inference are operationally  
69 different from each other. PhyloWGS clusters together SNVs at similar frequencies and then  
70 orders them to infer clone genotypes and phylogeny [37]. MACHINA follows a similar process,  
71 but also incorporates a model of cancer cell migration between tumor sites (seeding events) [13].  
72 LICHeE generates SNV clusters defined by the pattern of presence and absence of SNVs among  
73 tumor samples while considering SNV frequencies [34]. CloneFinder reconstructs ancestral  
74 clones in predicting clone genotypes [35]. Treeomics examines the presence and absence of  
75 SNVs among tumor samples and resolves evolutionarily incompatible patterns when

76 decomposing SNV profiles into clone genotypes [36]. Ultimately, all of these methods deconvolute  
77 individual clones from population bulk sequencing of multiple tumor samples acquired over time  
78 and/or different locations in a patient.

79 Surprisingly, absolute and relative accuracies of clone phylogenies produced by these  
80 computational methods have not been assessed using the same collection of datasets, i.e., their  
81 performances are yet to be benchmarked. Such benchmarking is critical, because of the biological  
82 relevance of the downstream inferences. For example, the accuracies of the order of driver  
83 mutations and the interrelationship of clones depend on the performance of current methods in  
84 accurately deconvoluting individual clone genotypes and reconstructing evolutionary events. No  
85 previous study has evaluated the relative accuracy of clone phylogenetic inferences, as they  
86 focused on introducing and assessing the strengths of the new clone prediction methods [13, 34-  
87 39]. Besides, the robustness of these computational methods to the complexity of clonal  
88 structures and the evolutionary histories of clones from different tumor sites is largely unknown.

89 Therefore, we evaluated the accuracy of clone phylogenetic inferences by seven clone  
90 prediction methods (**Table 1**). We used bulk sequencing datasets simulated under various tumor  
91 evolutionary scenarios. Simulated data included small and large numbers of persistent ancestral  
92 clones and metastatic tumors that arise from polyclonal seeding events. Our assessments are  
93 based on simulation studies because correct phylogenies are known, and computer simulation  
94 has emerged as a standard approach for evaluating the performance of statistical methods in  
95 cancer genomics [34, 35, 37, 42]. In this study, we identify and highlight the limitations of methods  
96 that can most accurately infer clone phylogenies.

## 97 **Results**

98 We analyzed 150 simulated datasets of tumor bulk sequencing data in which the number of tumor  
99 samples ranged from 6 to 11. Tumors and clone sequences were simulated with four distinct

100 models of branching evolution (G7, G12, P10, and MA datasets; **Fig. 1**), and a variety of simulated  
101 clone phylogenies (e.g., **Fig. 2**). Details of these simulated datasets are described in the **Methods**  
102 section. We inferred clone phylogenies for each simulated dataset by using seven different  
103 methods (**Table 1**). We used multiple metrics to assess the accuracy, including those measures  
104 that score the correctness of the order of mutations and the branching order within the  
105 reconstructed clone phylogenies.

### 106 ***Accuracy of ordering mutations***

107 A clone phylogeny can be viewed as a mutational tree [43] in which all the mutations are mapped  
108 along branches (e.g., **Fig. 3**). Such mutational trees can be used to test whether a pair of  
109 mutations have occurred concurrently, sequentially, or in parallel (**Fig. 3**). At first, we evaluated  
110 the accuracy of the predicted order of mutations by using the MLTED score; a smaller score  
111 shows greater similarity between the true and inferred mutational tree (see the **Methods** section  
112 for details). We begin with results for G7 and G12 datasets that were modeled after the predicted  
113 evolutionary histories of two patients (EV005 and RK26, respectively) (**Fig. 1a-1d**) [35, 44]. Each  
114 tumor sample may contain one or a few evolutionarily closely-related clones, assuming a localized  
115 genetic heterogeneity [4, 6], i.e., migration of cancer cells to another section of a tumor was  
116 assumed to be rare. In total, we obtained 60 simulated datasets (replicates) with 34-89 SNVs per  
117 dataset. G7 datasets contained seven tumor samples per dataset, while G12 datasets contained  
118 eleven samples. For the G7 datasets, all seven methods showed relatively small MLTED scores.  
119 For the G12 datasets, four methods (CloneFinder, MACHINA, Treeomics, and LICHeE) produced  
120 much smaller MLTED scores compared to other three (PhyloWGS, MixPhy, and Cloe) (**Fig. 4a**).

121 The clonal structures of tumors in P10 and MA datasets were more complex than G7 and  
122 G12 datasets. The P10 datasets were composed of a few tumor samples, in which ancestral  
123 clones were present alongside their descendants (**Fig. 1e** and **1f**). The MA datasets were

124 generated by simulating the evolution of primary and metastatic tumors. The clonal structure of  
125 metastatic tumors of some MA datasets was evolutionarily complex, as more than one founding  
126 (seeding) clone migrated from another tumor site(s) (e.g., **Fig. 1g** and **1h**). For the P10 and MA  
127 datasets, we found that the MLTED scores of Cloe were higher (worse) than other methods (**Fig.**  
128 **4a**). For the MA datasets, MLTED scores of all the methods were generally higher than the other  
129 datasets, and there were large differences among the datasets. Overall, MACHINA and LICHeE  
130 showed slightly better performance than the other methods.

131 Next, we evaluated error rates of ordering sequential, concurrent, and parallel mutations  
132 (**Fig. 3**). We generated all possible pairs of SNVs (mutations) and classified them into these three  
133 possible categories. In each category, we computed the proportion of real mutation pairs that  
134 were not present in the inferred tree, and the proportion of all incorrect mutation pairs. The  
135 average of these two proportions was used to assess the error rate of ordering the given type of  
136 mutations (see the **Methods** section for details). Sequential and concurrent mutations were  
137 inferred with lower accuracy than the parallel mutations (**Table 1**), a difference that was greater  
138 for P10 and MA datasets. For example, the error rate of inferring parallel mutations was only 4 –  
139 6% in CloneFinder, MACHINA, Treeomics, and LICHeE analyses for MA datasets, while the error  
140 rates for sequential and concurrent mutations were much higher (12 – 21%). Therefore,  
141 identification of parallel mutations was generally more reliable than classifying sequential or  
142 concurrent mutations.

#### 143 ***Accuracy of predicting branching patterns (topology of clone phylogeny)***

144 We next evaluated the accuracy of inferred branching patterns by computing TreeVec and RF  
145 distances (see the **Methods** section for details). These distances evaluate the errors of clone  
146 groupings in inferred phylogenies. For the G12 datasets (**Fig. 4b**), CloneFinder, MACHINA,  
147 Treeomics, and LICHeE showed smaller TreeVec distances than the other methods, i.e., these

148 methods produce more accurate branching patterns. Cloe generally showed higher TreeVec  
149 distances than other methods. For the G7 datasets, all the methods showed relatively small  
150 TreeVec, and indeed, reconstructed clone phylogenies were quite similar to the correct phylogeny  
151 for these data (**Additional file 1: Fig. S1**). These patterns are consistent with those based on  
152 MLTED scores (**Fig. 4a** and **Table 1**). The results of RF distances were also consistent with  
153 MLTED and TreeVec analyses (**Fig. 4c**).

#### 154 ***Impact of persisting ancestral clones***

155 To better understand factors that cause inference errors, we analyzed the impact of the presence  
156 of ancestral clones in tumor samples on the accuracy of clone inference. We found that fewer  
157 than 50% of the ancestral clones were identified by current methods (**Fig. 5**). Treeomics analysis  
158 rarely identified ancestral clones, even in datasets containing as many as six ancestral clones,  
159 and MixPhy also performed poorly.

160 All tested methods, except for Cloe, performed well in ordering mutations for a dataset  
161 that contained only two ancestral clones (**Fig. 6a**). However, the accuracy of ordering mutations  
162 declined when datasets contained tumors with a large number of ancestral clones. In these  
163 datasets, CloneFinder, MACHINA, Treeomics, and LICHeE analyses generally had a lower error,  
164 indicating their robustness to the presence of persisting ancestral clones within a dataset.

165 For Treeomics, LICHeE, and CloneFinder, the error rate of predicting parallel mutation did  
166 not increase significantly with an increasing number of ancestral clones, but the error rates in  
167 predicting sequential and concurrent mutations increased significantly (**Fig. 6a**). This is because  
168 the inability to detect ancestral clones would misclassify sequential mutations as concurrent  
169 mutations (e.g., **Additional file 1: Fig. S2**).

170 Consistent with the ability to predict correct mutation orders, all tested methods (except  
171 for Cloe) showed relatively small TreeVec and RF distances when a dataset contained only two  
172 ancestral clones (**Fig. 6b**), while CloneFinder, MACHINA, Treeomics, and LICHeE generally  
173 produced smaller TreeVec and RF distances for datasets with larger numbers of ancestral clones.  
174 Overall, no method produced highly accurate clone phylogenies for datasets containing a large  
175 number of ancestral clones.

### 176 ***Impact of polyclonal seeding events during metastatic tumor evolution***

177 The analysis of MA datasets was used to assess the impact of polyclonal seeding of metastatic  
178 tumors on clone phylogeny and mutation orders. These datasets contained primary tumors and  
179 four or six metastatic tumors. Up to four metastatic tumors per dataset evolved with polyclonal  
180 seeding events, i.e., these metastatic tumors were founded by more than one seeding clone.  
181 When a metastatic tumor received more than one seeding clone (polyclonal seeding events),  
182 these tumors contained clones from different evolutionary lineages due to distinct founder  
183 (seeding) clones (e.g., **Fig. 1g** and **1h**). No tested method was able to accurately identify a  
184 majority of clones within multiple-seeded metastatic tumors (**Fig. 7a**). MACHINA is the only  
185 method that incorporates the metastatic progression model of clone seeding events during its  
186 estimation process, and it did outperform other tested methods when datasets contained the  
187 largest number of multiple-seeding events (**Fig. 7a**). Overall, the poor performance of all the  
188 methods in inferring clones resulted in higher error rates of ordering mutations and reconstructing  
189 branching patterns (**Fig. 7b-7g**).

190 Even when a MA dataset contained only one polyclonal seeding event in a metastatic  
191 tumor, we observed errors in phylogenetic predictions, mainly caused by unsuccessful inference  
192 of clones' presence within that metastatic tumor. For example, **Figure 8** shows inferred clone  
193 phylogenies for an example dataset (**Fig. 1g** and **1h**) in which a metastatic tumor (M5)



194 experienced polyclonal seeding events such that two seeding clones came from two distinct clone  
195 lineages (clone lineage C/D, which contained clone C and D, and lineage M with clone M). All the  
196 methods, including MACHINA, identified only one out of these two clone lineages (lineages C/D  
197 or M), with MACHINA producing two solutions (**Fig. 8b** and **8c**). The first solution contained only  
198 clone C, whereas the second solution contained only clone M. In these MACHINA phylogenies,  
199 these two clones were connected with erroneously long branches (**Fig. 1g**). Thus, those correct  
200 clones found within the M5 metastatic tumor were convoluted into one clone genotype in the  
201 inferred clone phylogenies. This same type of error was observed in predicted clone phylogenies  
202 generated via other methods (**Fig. 8**), except for Cloe (which produced phylogenies that  
203 dramatically differed from the true phylogeny). Apart from these errors, the predicted clone  
204 phylogenies were largely similar to the true clone phylogeny, and the branching patterns were  
205 mostly correct (**Fig. 1** and **Fig. 8**). For this example MA dataset, MACHINA, CloneFinder, and  
206 LICHeE produced more accurate clone phylogenies than other methods. For example,  
207 Treeomics, PhyloWGS, and MixPhy produced much smaller phylogenies, as these methods did  
208 not infer many ancestral or highly-similar clones.

209 This pattern of errors in inferred clone phylogenies became more acute when a dataset  
210 included many metastatic tumors that evolved with polyclonal seeding events. For example, when  
211 a dataset was composed of four metastatic tumors with polyclonal seeding events, inferred clone  
212 phylogenies contained fewer clones than the true phylogeny (**Additional file 1: Fig. S3**). The  
213 tested methods tended to predict only one clonal lineage for each of the four metastatic tumors  
214 of this dataset. Note that Cloe produced a phylogeny with little similarity to the true phylogeny.  
215 MACHINA produced 870 solutions for this example dataset, with the best solution (smallest  
216 number of SNV assignment errors per clone) similar to the true phylogeny, and the worst solution  
217 that missed many clonal lineages. Overall, current clone prediction methods cannot reliably  
218 decompose many clones within metastatic tumors with polyclonal seeding events.

## 219 ***Empirical data analysis***

220 The application of these clone prediction methods to an empirical dataset (A7 dataset from a  
221 previous study [30]) showed results consistent with our analyses of simulated data. The original  
222 study reported that metastatic rib and lung tumors harbored clones from different clonal lineages  
223 (**Fig. 9a**). The lung tumor contained three different clone lineages, indicating a complicated history  
224 of metastatic tumor evolution. Different methods predicted clone phylogenies that showed limited  
225 similarity to the clone phylogeny reported in the original study (**Fig. 9b-9i**). MACHINA produced  
226 four similar solutions (**Fig. 9b-9e**). However, only the predicted evolutionary relationship of clones  
227 from liver and kidney tumors agreed with those reported in the original study [30]. The predicted  
228 clone sharing between lung and brain tumors reported by CloneFinder agreed with the original  
229 study, but the clone phylogeny differed dramatically (**Fig. 9f**). Treeomics correctly predicted the  
230 evolutionary relationship of clones from the liver, kidney, and rib tumors, but did not predict most  
231 of the ancestral clones (**Fig. 9g**), a failing that we also observed in our simulation results.  
232 PhyloWGS produced two distinct but highly similar clone phylogenies (**Fig. 9h and 9i**) that  
233 indicated the presence of three clonal lineages, instead of the two lineages reported in the original  
234 study. LICHeE analyses did not produce a solution. MixPhy produced >400 clones for this dataset,  
235 and Cloe results suggested the unlikely scenario that all predicted clones were present in most of  
236 the samples. Therefore, we anticipate that the application of different computational methods in  
237 actual empirical data analysis will result in widely varying inferences, making it challenging to  
238 reach reliable biological conclusions, when the tumor evolution is highly complex.

239

## 240 **Discussion**

241 Predictions of accurate clone phylogenies are essential to infer the order of driver mutation  
242 occurrences and the evolutionary relationship of clones. We tested the accuracy of published

243 methods in reconstructing clone phylogenies as a first step in identifying the patterns of errors in  
244 clone phylogeny inference, which revealed some useful guidelines for applying computational  
245 methods in practical data analysis. To begin with, we suggest the use of CloneFinder, MACHINA,  
246 Treeomics, and LICHeE, because they often showed lower error rates of ordering mutations and  
247 inferring phylogenies. All of these methods benefit from the use of intrinsic evolutionary  
248 relationship of tumor clones. The evolutionary information provides resolution beyond inferences  
249 primarily based on the dissimilarities of observed SNV frequencies because low read depth cause  
250 SNV frequencies to have significant variance and clone predictions based on only the similarities  
251 of observed SNV frequencies become error-prone.

252 Careful consideration of the input data is strongly recommended before choosing a  
253 method for analyses. First, these clone prediction methods require copy-number-neutral SNVs,  
254 because observed SNV frequencies are affected by copy number alterations (CNAs). SNV  
255 frequencies should be adjusted to eliminate the impact of CNAs. Notably, Cloe [39] is designed  
256 for the analysis of datasets with CNAs, but it did not perform well for datasets without CNAs.

257 Also, most methods are known not to be robust to the presence of incorrect SNV  
258 assignments, so one should proceed with extreme caution when analyzing datasets with high  
259 rates of sequence error. For example, LICHeE may fail to produce any inferences on such  
260 datasets or the accuracy may become much lower than other methods (e.g., Treeomics) [35].  
261 LICHeE failed to produce any results for our example empirical dataset [30]. In general, clone  
262 predictions are expected to become more challenging when the dataset contains CNAs and  
263 sequencing errors. Also, the accuracy of clone phylogeny inference can be adversely impacted  
264 by biological factors (e.g., the impact of strong natural selection).

265 Another important consideration in experimental design is the benefit of sequencing a  
266 larger number of tumor samples. The most successful methods in our evaluations use the intrinsic

267 evolutionary relationships among tumor samples so a larger sample number can provide more  
268 information to improve clone predictions. All of the methods tested here performed well on  
269 simulated datasets with the largest number of tumor samples (G12 datasets). Although the actual  
270 number of tumor samples preferred depends on the situation, it is clear that one should avoid  
271 datasets generated from only a few samples. Importantly, datasets with a very small number of  
272 samples will underestimate the genetic heterogeneity of a tumor site, and therefore, the use of a  
273 large number of samples per patient is a standard recommendation [6, 45].

274 We do not expect any of the currently available methods to be effective in situations where  
275 each tumor sample contains clones from many lineages (if tumors frequently exchange clones).  
276 We have previously documented that CloneFinder will not perform well on such datasets [35].  
277 Also, our simulation analyses have shown that none of the tested methods perform well when a  
278 mixture of clones from different evolutionary lineages exist within metastatic tumors (multiple  
279 seeding).

280 Lastly, we suggest using multiple methods to infer clone phylogenies and examining the  
281 consistency among the results. We found that the best performing methods produced similar  
282 results when inferred clone phylogenies were accurate. When using Treeomics, it is crucial to be  
283 aware that the inferred clone phylogenies will not include most of the ancestral clones. Also,  
284 potential errors on clonal lineage deconvolution can be detected when MACHINA produces at  
285 least two disparate clone phylogenies (e.g., **Fig. 8**) or when MACHINA produces hundreds of  
286 solutions. In general, the inconsistency of inferred clone phylogenies suggests the influence of  
287 complicated clonal structures within tumors, i.e., a mixture of different lineage clones. Currently,  
288 no method can produce accurate clone phylogenies from such data. Thus, consistency among  
289 inferred phylogenies may be useful to validate inferences.

290 In summary, we can accurately infer clone phylogenies only when tumor evolution  
291 generally tracks clonal evolution, a relationship that is disrupted when tumors exchange clones  
292 reduce the quality of the inferred clone phylogenies. Also, ancestral clones that persist alongside  
293 the descendant clones within a tumor sample are difficult to identify, leading to inaccuracy in the  
294 reconstruction of evolutionary events.

## 295 **Conclusions**

296 Analyses of correct clone phylogenies are critical to a better understanding of tumor evolution and  
297 the influence of genetic heterogeneity. We recommend clone prediction methods that use the  
298 intrinsic evolutionary relationship of tumor samples (e.g., CloneFinder, MACHINA, TreeOmics,  
299 and LICHeE). The inferences of multiple methods should also be compared to validate  
300 predictions. There is a strong need for more advanced methods that can perform well for datasets  
301 with intermixing of tumor samples.

302

## 303 **Methods**

### 304 ***Generation of bulk sequencing data***

305 We analyzed 150 simulated datasets that were available from published studies in which the  
306 accuracy of inferred clone sequences was assessed [13, 35]. Each dataset contained information  
307 on mutant and wild-type read counts (with read counting errors).

308 *G7 and G12 datasets.* These datasets contained seven and twelve clones, respectively, modeled  
309 after the predicted evolutionary histories of two patients (EV005 and RK26 [44], respectively) (**Fig.**  
310 **1a-1d**) [35]. Each tumor sample may contain one or a few evolutionarily closely-related clones,  
311 assuming a localized genetic heterogeneity due to branching evolution [4, 6]. Thus, the migration

312 of cancer cells to another section of a tumor was assumed to be rare in these datasets. In total,  
313 we obtained 60 simulated datasets (replicates) with 34-89 SNVs per dataset.

314 *P10 datasets*. In these datasets, various numbers of clones persisted within a sector (sample) of  
315 a tumor after the origin of descendant clones. Ten random clone phylogenies were simulated,  
316 and every tumor sample was populated with one tip clone and its ancestral clones (“localized  
317 sampling process” [34]) (**Fig. 1e** and **1f**). Each of P10 datasets contained 2 – 6 ancestral clones  
318 (30 datasets). A selection of simulated clone phylogenies is shown in Figure 3 of Miura et al. [35].

319 *MA datasets*. These datasets were generated by modeling the evolution of primary and metastatic  
320 tumors (four or seven metastatic tumors per dataset) [13]. Metastatic tumors were founded by  
321 cancer cells (seeding clones) that migrated from another tumor site (primary or another metastatic  
322 tumor). Under a simple metastatic tumor evolution scenario, each metastatic tumor received a  
323 single founder (seeding) clone from another tumor site, and a metastatic tumor contained only  
324 clones that evolved from a single seeding clone. Clonal structures of metastatic tumors became  
325 more complicated when a metastatic tumor was seeded by more than one clone (polyclonal  
326 seeding events). In MA datasets, a metastatic tumor received a maximum of two seeding clones,  
327 and any dataset may contain more than one metastatic tumor with polyclonal seeding events.  
328 Thus, the observed genotypes of these metastatic tumors represented two convoluted clone  
329 lineages, and clone prediction methods were required to correctly identify such tumors and  
330 decompose them into two distinct clone lineages (e.g., **Fig. 1g** and **1h**). Each MA dataset  
331 contained up to four metastatic tumors with polyclonal seeding events. Each clone phylogeny was  
332 unique (60 MA datasets). All the clone phylogenies are shown in **figure 2**.

### 333 ***Selection of clone prediction methods and parameter settings***

334 We selected clone prediction methods that have performed well in predicting clone genotypes  
335 from observed SNV frequencies or read counts of bulk sequencing data [35]. That is, we excluded

336 methods that produce highly incorrect clone genotypes because such clone genotypes do not  
337 produce correct clone phylogenies. By this criterion, we excluded CITUP [46], BayClone2 [47],  
338 Clomial [48], Canopy [49], cloneHD [50], and AncesTree [51] (see **Additional file 1: Table S1** for  
339 the average number of SNV assignment errors per clone). We did not include methods that  
340 require prior information of the composition of SNV clusters (e.g., TrAp [52]) or those that require  
341 the use of another software to produce clone genotypes by ordering predicted clusters (e.g.,  
342 PyClone [53] and SciClone [54]). Lastly, we did not include methods that were designed for the  
343 analyses of single-cell sequencing data (e.g., SCITE [55] and BEAM [56]), because clone  
344 deconvolution is not necessary for this type of data, while these methods focus on imputing  
345 missing data and minimizing SNV assignment errors in the inference of cell phylogenies [31, 32].  
346 These considerations resulted in the selection of seven clone prediction methods (**Table 1**) [13,  
347 34-39]. Each method was used with its default or recommended parameter settings. In MA  
348 datasets, we found many similar clone genotypes, so we used parameter settings that can  
349 differentiate similar clone genotypes. This modification was applied only for LICHeE and  
350 CloneFinder, as only these two methods include options for this purpose.

351 MACHINA [13]. We used the PMH-TI mode in the MACHINA software, which infers clone  
352 genotypes from read count data. The MACHINA software requires *a priori* identification of tumor  
353 sites as primary or metastatic for each sample. Since G7, G12, and P10 datasets were simulated  
354 without the consideration of primary and metastatic tumor evolution, we assumed that the primary  
355 tumor contained the root clone (e.g., clone A for G7 and G12 datasets) (**Fig. 1a and 1c**). When a  
356 root clone was not present in a dataset, we selected the clone that was most closely located to  
357 the root of a simulated phylogeny. For MA datasets, we provided the correct tumor site (primary  
358 or metastatic site, in which distinct metastatic tumor sites were accordingly distinguished) for each  
359 clone sequence that was found. Note that MACHINA often produced a large number of solutions  
360 (>10 solutions per dataset) for G7, G12 and MA datasets. In those cases, we first identified the

361 best and worst solutions for each dataset, which were determined based on the average number  
362 of SNV assignment errors per clone. We reported the average error rate (see below) of the best  
363 and worst solutions.

364 LICHeE [34]. Following the default settings, we set the variant allele frequency (VAF) error margin  
365 the value 0.1. SNVs were considered robustly present in a sample at VAF > 0.005 (robust SNVs),  
366 and the others were considered absent in a sample. SNVs with VAF > 0.6 were excluded. LICHeE  
367 groups SNVs based on the pattern of presence/absence of mutations across the samples and  
368 each SNV group was required to contain at least two robust SNVs. LICHeE also clusters SNVs  
369 by VAF similarities. We required that an SNV cluster contained at least two SNVs unless an SNV  
370 was sample specific. All the SNV groups/clusters were initially kept in the network. Two  
371 groups/clusters could collapse when mean VAF difference was < 0.2.

372 LICHeE did not produce clonal compositions of samples (i.e., clone frequencies). Thus, we  
373 estimated clone frequencies using the relationship  $\frac{1}{2}f \times M = V$ , where  $f$  is a two-dimensional matrix  
374 of estimated clone frequencies of the samples,  $M$  is a matrix of predicted clone genotypes, and  $V$   
375 is the observed SNV frequency [33]. The equation above applies to cases where the variants are  
376 free of copy number alterations (CNAs) [33], which is the case for our datasets. We estimated  $f$   
377 through the regression of  $V$  to a function of  $M$  and  $f$  [57]. Clone frequencies were estimated  
378 excluding SNVs with small total read count (<50) and mutant read count (<2), because those  
379 observed SNV frequencies were not reliable. When ancestral clones were predicted to co-exist  
380 with their descendant clones within a sample, we tested if these ancestral clones were spurious.  
381 Between a pair of ancestral and descendant clones, we compared observed SNV frequencies  
382 that are unique to the descendant clone and those shared with the ancestral clone. We used the  
383 expectation of higher observed SNV frequencies on shared (mutations that were found in both  
384 clones) than on unique mutations (mutations that were found in only a descendant clone;  $t$ -test)



385 to discover the spurious presence of ancestral clones. When the differences between SNV  
386 frequencies were not significant ( $P > 0.05$ ), the ancestral clones were removed. Also, we  
387 discarded clones present at low frequencies (<2%).

388 In the analyses of MA datasets, only SNVs with zero SNV frequency were considered to be  
389 robustly absent from a sample, and SNVs with  $> 0.0001$  frequency were considered to be robustly  
390 present in a sample (robust SNVs). All SNVs were examined regardless of their observed  
391 frequency. The minimum number of SNVs per cluster/group was set to one. Two SNV clusters  
392 were collapsed when mean SNV frequency differences were less than 1%. We did not discard  
393 any ancestral clones.

394 CloneFinder [35]. We estimated clone genotypes using SNVs with at least 50 reference read  
395 counts and two mutant read counts, and we discarded clones when estimated clone frequencies  
396 were  $< 2\%$ . To analyze MA datasets, we did not combine similar clone genotypes or discard  
397 clones. We used all reads.

398 Treeomics [36]. We used the option of enabling subclone detection.

399 PhyloWGS [37]. The fraction of expected reference allele sampling from the reference population  
400 and the variant population were 0.999 and 0.4999, respectively. We set copy number equal to  
401 one (heterozygous mutant allele). As PhyloWGS did not produce clone frequencies, we computed  
402 clone frequencies using the approach described for LICHeE (see above).

403 Mixed Perfect Phylogeny (MixPhy) [38]. We performed analyses in MixPhy (v0.1) with the option  
404 of a heuristic algorithm. As the input file requires a binary matrix of tumor sample genotypes  
405 (presence/absence of mutation), we provided correct sample genotypes, assuming that there  
406 were no false positive or false negative detections of mutations.

407 Cloe [39]. We applied Cloe with 10,000 iterations and 4 MCMC parallel chains at temperatures of  
408 1, 0.9, 0.82, and 0.75. For the posterior evaluation of MCMC sampled trees, the burn-in of MCMC  
409 chains was 0.5, and chain thinning was 4. The maximum number of clones for a dataset was set  
410 to the true clone count.

#### 411 ***Evaluation of predicted clone phylogenies***

412 We compared each predicted clone phylogeny with the respective true clone phylogeny by using  
413 the following four metrics.

414 Multi-labeled tree edit distance (MLTED) [58]. A clone phylogeny is often viewed as a mutational  
415 tree [43] in which all the mutations are mapped along branches. Mutational trees are useful when  
416 the number of tips in the inferred clone phylogeny differs from the true phylogeny and when the  
417 sequences of the inferred clones do not match all the true clones. We used the Multi-labeled Tree  
418 Edit Distance (MLTED score) for comparing the inferred and the true tree, as it has been designed  
419 to evaluate clone trees [58], available at <https://github.com/khaled-rahman/MLTED>. This  
420 algorithm requires that the inferred tree contains the same set of mutations as in the true tree.  
421 Because of errors in clone sequence predictions, some mutations were not assigned to any  
422 branch in the inferred tree. These mutations were placed at the root of the inferred mutational  
423 tree.

424 The error rate of ordering mutations. We generated all possible pairs of SNVs (mutations) and  
425 classified them into three possible types, i.e., concurrent, sequential, and parallel (see **Fig. 3** for  
426 examples). Concurrent mutations are those that occurred on the same branch (irrespective of  
427 their order), whereas sequential and parallel mutations are those that occurred on different  
428 branches of the clone phylogeny. More specifically, two mutations are sequential if one occurred  
429 on the ancestral branch and the other on its descendant branch, but multiple intervening branches  
430 may separate them. Two mutations are parallel if they are found on sibling lineages that have

431 descended from their most recent common ancestor. Any true mutation pair not found in the  
432 inferred tree was classified as “unassigned.”

433 We estimate the error rate of ordering concurrent, sequential, and parallel mutations,  
434 separately. In each category, we first scored the number of true mutation pairs that were not  
435 present in the inferred tree and divided it by the total number of true mutation pairs. Then, we  
436 scored the number of mutation pairs that were incorrect and divided it by the total number of  
437 inferred mutation pairs. Then, the average of these two proportions was used as the error rate of  
438 ordering the given type of mutations. Similar measures have been used to evaluate clone  
439 prediction methods in previous studies [34].

440 *Advanced Tree vector (TreeVec) [59]*. We also evaluated the accuracy of branching patterns  
441 (topology) in inferred clone phylogenies (clonal lineage trees [43]). For this purpose, we first  
442 mapped inferred clone genotypes to the true clone genotypes, because inferred clone genotypes  
443 never perfectly match the true clone genotypes. We mapped each inferred clone genotype to its  
444 most similar true clone genotype in a two-step process. First, each true clone genotype was  
445 compared to all the inferred clone genotypes, and the two clones with the smallest difference  
446 were paired. When the number of inferred clones was greater than the number of true clones, the  
447 remaining inferred clones were paired with the most similar true clone genotype. For uniformity,  
448 we reconstructed inferred clone phylogenies by using predicted clone genotypes produced by  
449 each method. Because mutations arose only once in the computer simulated data, the maximum  
450 parsimony analysis was suitable [60] and was performed using MEGA-CC [61]. All the clone  
451 phylogenies were rooted using germline sequences (normal cells) as outgroups. In inferred clone  
452 phylogenies, we labeled tips with clone annotations. When an inferred clone genotype had two  
453 different annotations, we duplicated the genotype in an inferred clone phylogeny, i.e., the

454 corresponding tip was duplicated. Also, two inferred clone genotypes might have the same  
455 annotation. In this case, two tips in an inferred clone phylogeny were labeled identically.

456 Among various tree distance computation methods for phylogenies [62], we selected the  
457 advanced TreeVec distance developed by Kendall et al. [59], because TreeVec allowed more  
458 than one tip with identical labels. Briefly, TreeVec distance computation first collapsed any  
459 monophyletic clade(s), i.e., a clade with tips that had an identical label. Then, the traditional  
460 TreeVec distance [63] was computed, which counted the number of branches (edges) between  
461 the root and the node of the most recent common ancestor (MRCA) of a pair of clones. For all  
462 pairs of clones, the Euclidean metric between inferred and true counts was computed. We used  
463 the treespace software [64] to compute this advanced TreeVec distance.

464 Robinson and Foulds (RF) distance [65]. We also computed RF tree distance, because it  
465 is widely applied in the evaluation of species phylogenies. We used PhyloNET software [66] to  
466 count the number of partitions that were common and different between the true and the inferred  
467 phylogeny. The RF distance is the number of differing partitions divided by the total number of  
468 partitions in the two phylogenies. Note that RF distance computation requires that both the  
469 inferred and the true clone phylogenies contain the same number of tips (clones). However,  
470 inferred clone phylogenies may contain more tips than the respective true phylogenies, when  
471 more than one tip is assigned an identical clone annotation (i.e., more than one inferred clone  
472 genotype was similar to a true genotype). When there were too many tips in the inferred tree, we  
473 retained only those tips that showed the highest similarity to the true clone genotypes, such that  
474 each true clone genotype was matched with exactly one inferred genotype.

#### 475 ***Empirical data analyses***

476 We obtained an empirical dataset (patient A7 dataset [30]; [https://github.com/raphael-](https://github.com/raphael-group/machina)  
477 [group/machina](https://github.com/raphael-group/machina)), which contained genotypes for 478 copy-neutral SNVs. This dataset contains

478 SNV frequencies of one primary tumor sample (breast) and four metastatic tumors (lung, liver,  
479 rib, and brain), for which clone phylogenies and clonal composition of each sample have been  
480 previously reported [30]. For real data, true clone genotypes are not available, so we annotated  
481 each clone on the inferred phylogeny based on the sample(s) that contained it (**Fig. 9a**) in order  
482 to compare the reported phylogeny [30] with those inferred by the clone prediction methods listed  
483 in **Table 1**.

484

485

486 **Table**

487 **Table 1.** Error rates of methods in inferring sequential, parallel, and concurrent mutations.

| Mutation type      | Method      |         |           |        |        |          |      |
|--------------------|-------------|---------|-----------|--------|--------|----------|------|
|                    | CloneFinder | MACHINA | TreeOmics | LICHeE | MixPhy | PhyloWGS | Cloe |
| <i>G7 dataset</i>  |             |         |           |        |        |          |      |
| Sequential         | 4%          | 7%      | 5%        | 17%    | 9%     | 15%      | 10%  |
| Parallel           | 3%          | 6%      | 4%        | 19%    | 9%     | 25%      | 12%  |
| Concurrent         | 2%          | 4%      | 10%       | 20%    | 10%    | 13%      | 14%  |
| <i>G12 dataset</i> |             |         |           |        |        |          |      |
| Sequential         | 1%          | 7%      | 6%        | 5%     | 38%    | 37%      | 44%  |
| Parallel           | 0%          | 4%      | 4%        | 3%     | 15%    | 34%      | 49%  |
| Concurrent         | 1%          | 5%      | 12%       | 0%     | 0%     | 27%      | 62%  |
| <i>P10 dataset</i> |             |         |           |        |        |          |      |
| Sequential         | 10%         | 15%     | 11%       | 7%     | 17%    | 21%      | 32%  |
| Parallel           | 3%          | 5%      | 1%        | 1%     | 6%     | 9%       | 21%  |
| Concurrent         | 11%         | 17%     | 13%       | 10%    | 11%    | 13%      | 47%  |
| <i>MA dataset</i>  |             |         |           |        |        |          |      |
| Sequential         | 19%         | 12%     | 18%       | 21%    | 32%    | 28%      | 64%  |
| Parallel           | 5%          | 4%      | 6%        | 5%     | 7%     | 11%      | 21%  |
| Concurrent         | 20%         | 14%     | 20%       | 17%    | 20%    | 21%      | 86%  |
| Average            | 6%          | 8%      | 9%        | 11%    | 15%    | 21%      | 38%  |

488

489 Note.- See the **Methods** section for details about the calculation of error rates.

490

491 **Figures**

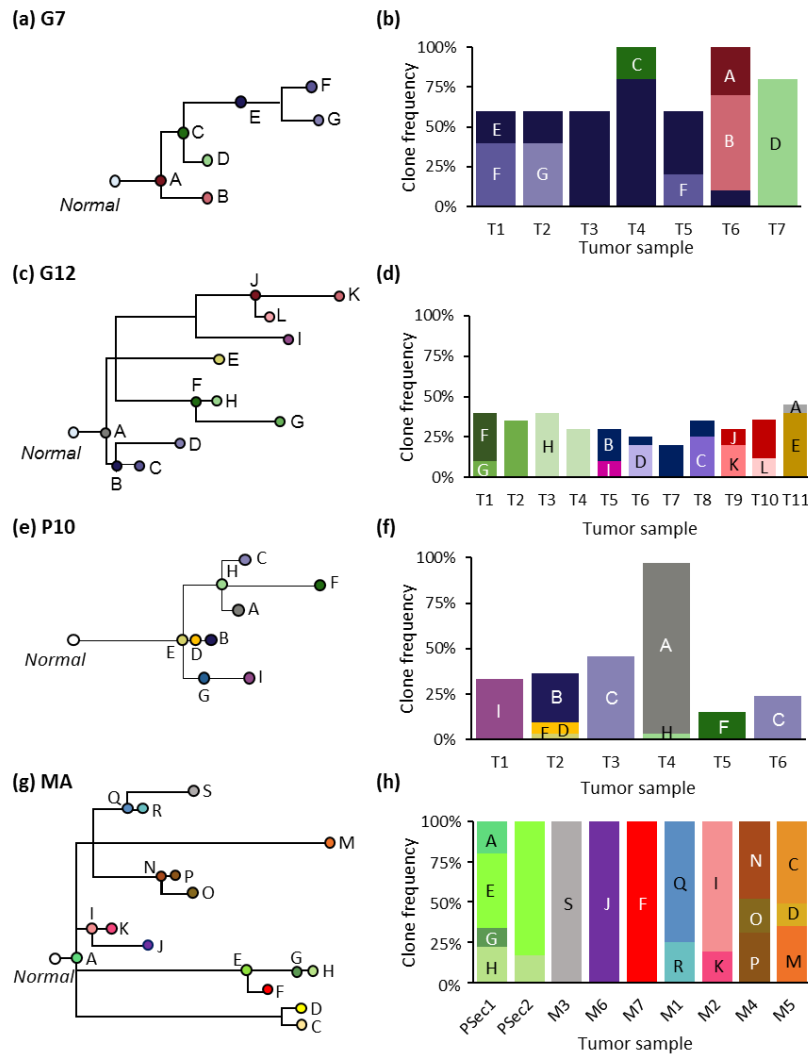

492

493 **Figure 1.** Simulated clone phylogenies and tumor composition. **(a and b)** A phylogeny, and clone  
 494 frequencies of seven clones and seven tumor samples (T1-T7) derived from EV05 tree (G7  
 495 datasets) [44]. **(c and d)** A phylogeny and clone frequencies of twelve clones and eleven tumor  
 496 samples (T1-T11) derived from RK26 tree (G12 datasets) [44]. **(e and f)** One of thirty phylogenies  
 497 and its tumor composition from P10 datasets [35]. **(g and h)** One example of MA datasets (out of  
 498 the 60) with primary tumor (Psec1 and Psec2) and metastatic tumors (M1-M5) [13]. Note that  
 499 tumor purities are 100% for all the samples.

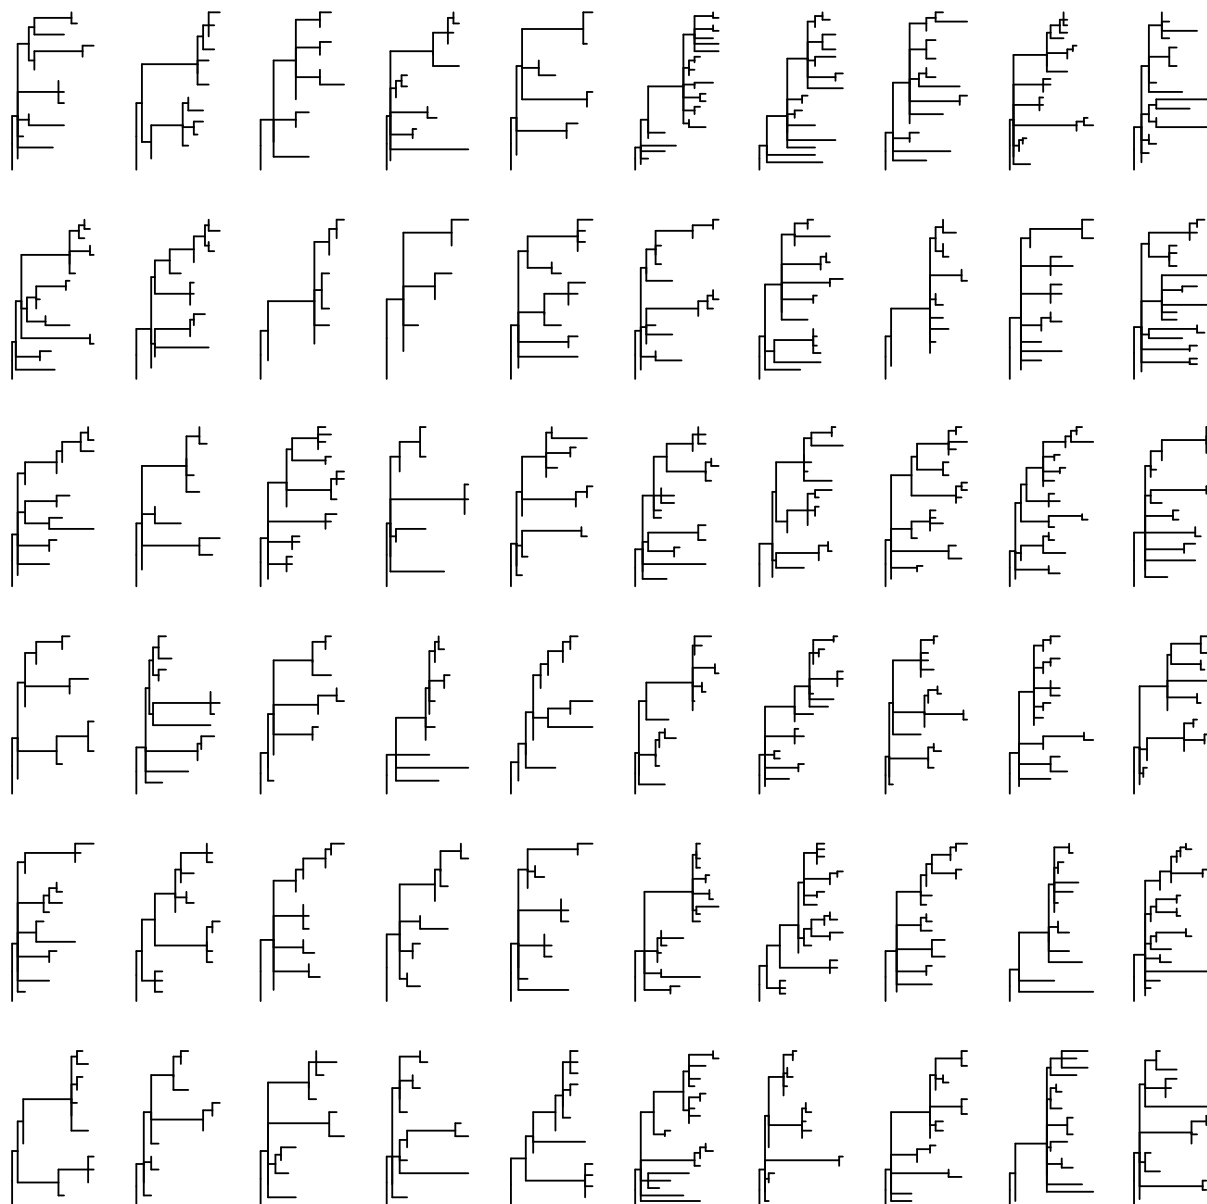

500

501 **Figure 2:** Clone phylogenies used for simulating MA datasets. All clone phylogenies were  
502 different.

503



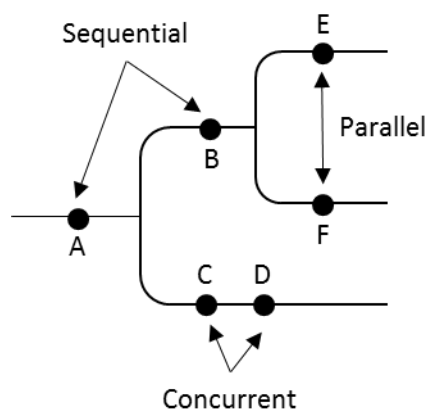

504

505 **Figure 3:** A mutational tree with concurrent (e.g., C and D), sequential (e.g., A and B), and parallel  
506 (e.g., E and F) mutations. Dots depict mutations. Order of mutations on a branch (e.g., C and D)  
507 cannot be determined based on the clone phylogeny alone.

508

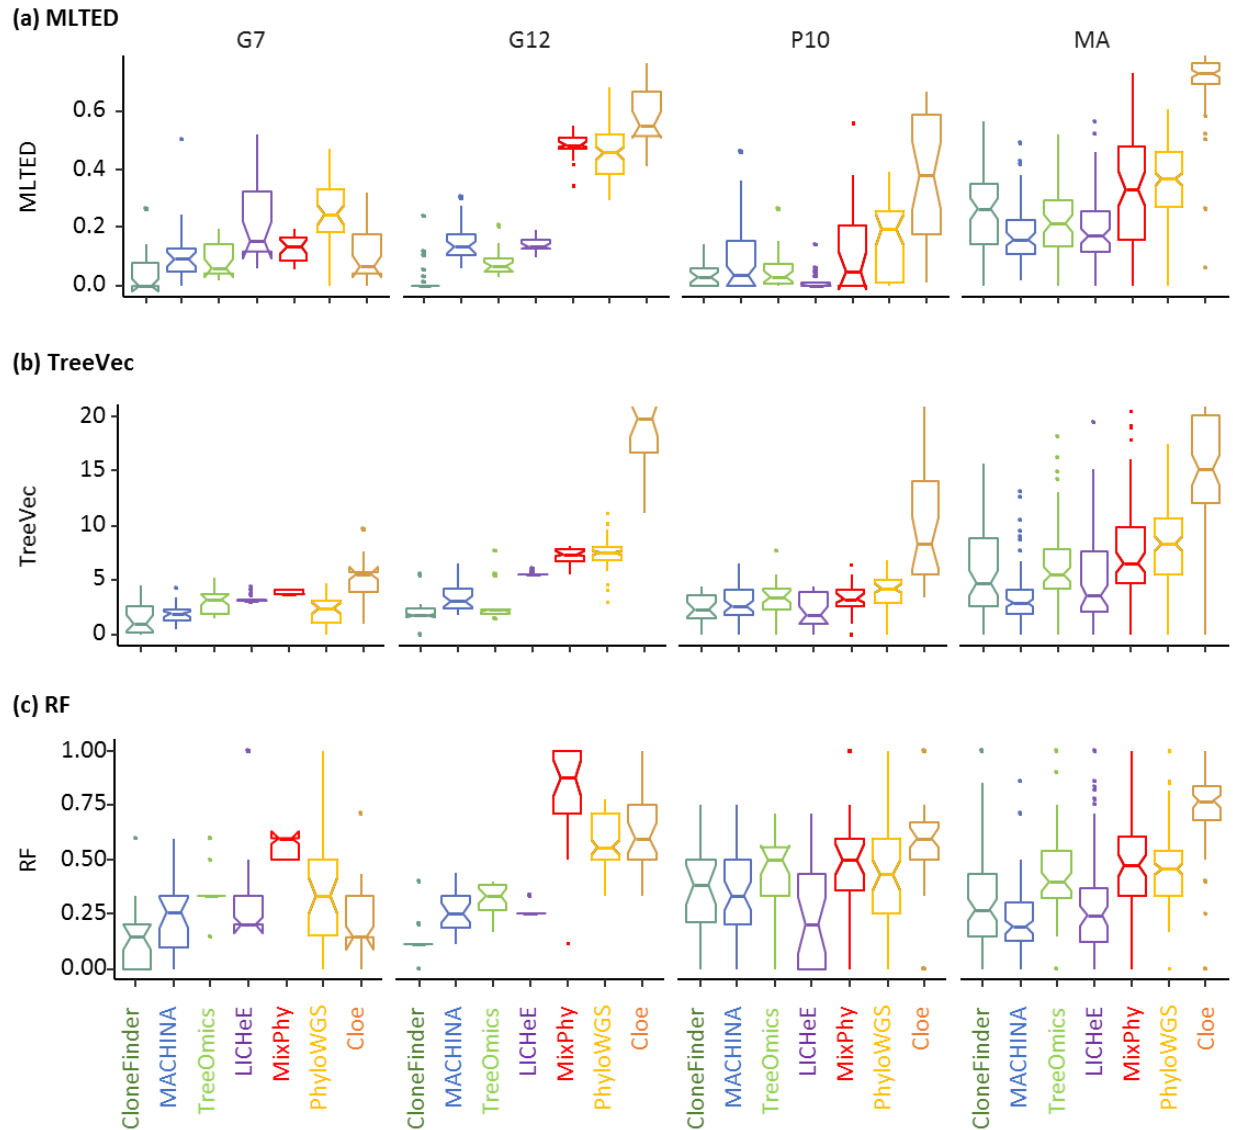

509

510 **Figure 4.** Performance of seven methods measured by (a) MLTED, (b) TreeVec, and (c) RF  
511 distances. MLTEDs show the accuracy of inferred mutation orders, whereas TreeVec and RF the  
512 accuracy of inferred clone phylogenies (small values indicate higher accuracy).

513

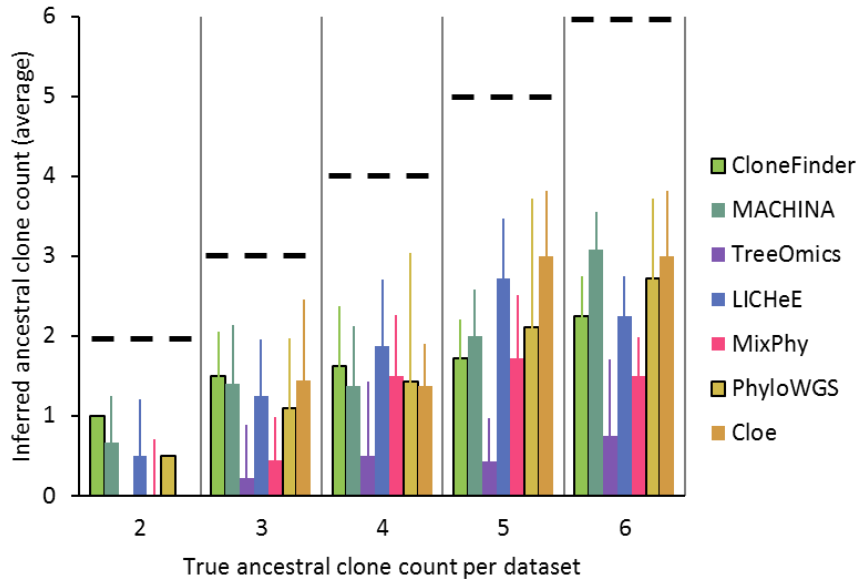

514

515 **Figure 5:** The average number of ancestral clones that were identified per dataset for the P10  
516 datasets. We grouped P10 datasets based on the true number of ancestral clones in a dataset.  
517 For each dataset, we counted the number of ancestral clones identified by a clone prediction  
518 method. We then computed the average across the dataset. Dashed lines are the correct count.  
519 Error bars represent standard deviation values.

520

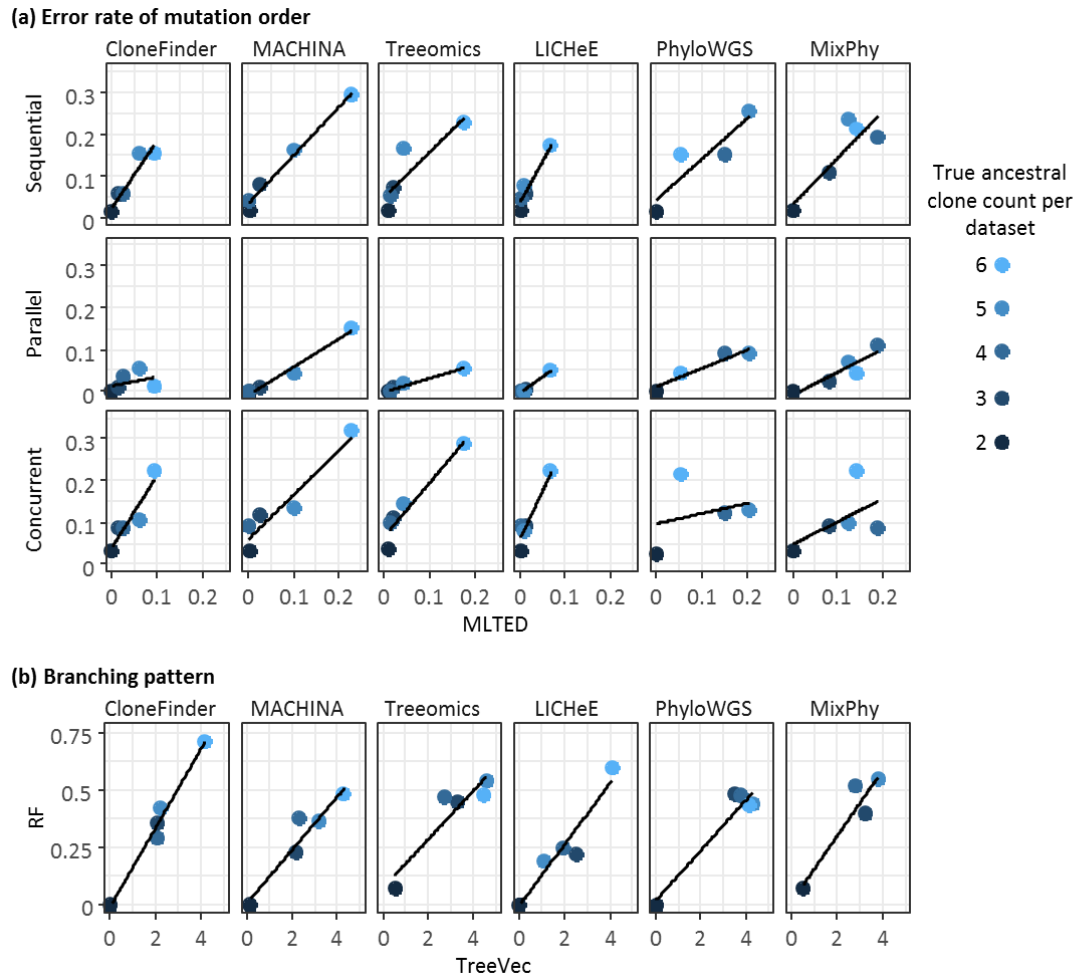

521

522 **Figure 6:** Accuracy of ordering mutations and inferring branching patterns, when a dataset  
 523 contained various number of of ancestral clones. P10 datasets were used and were grouped  
 524 based on the true ancestral clone count in a dataset. Each point shows the average of tree  
 525 distance across the datasets. **(a)** The average error rate of ordering mutations and MLTED. **(b)**  
 526 RF distances and TreeVec. Cloe method was excluded because both MLTED scores and  
 527 average error rates were very high (**Fig. 4** and **Table 1**).

528

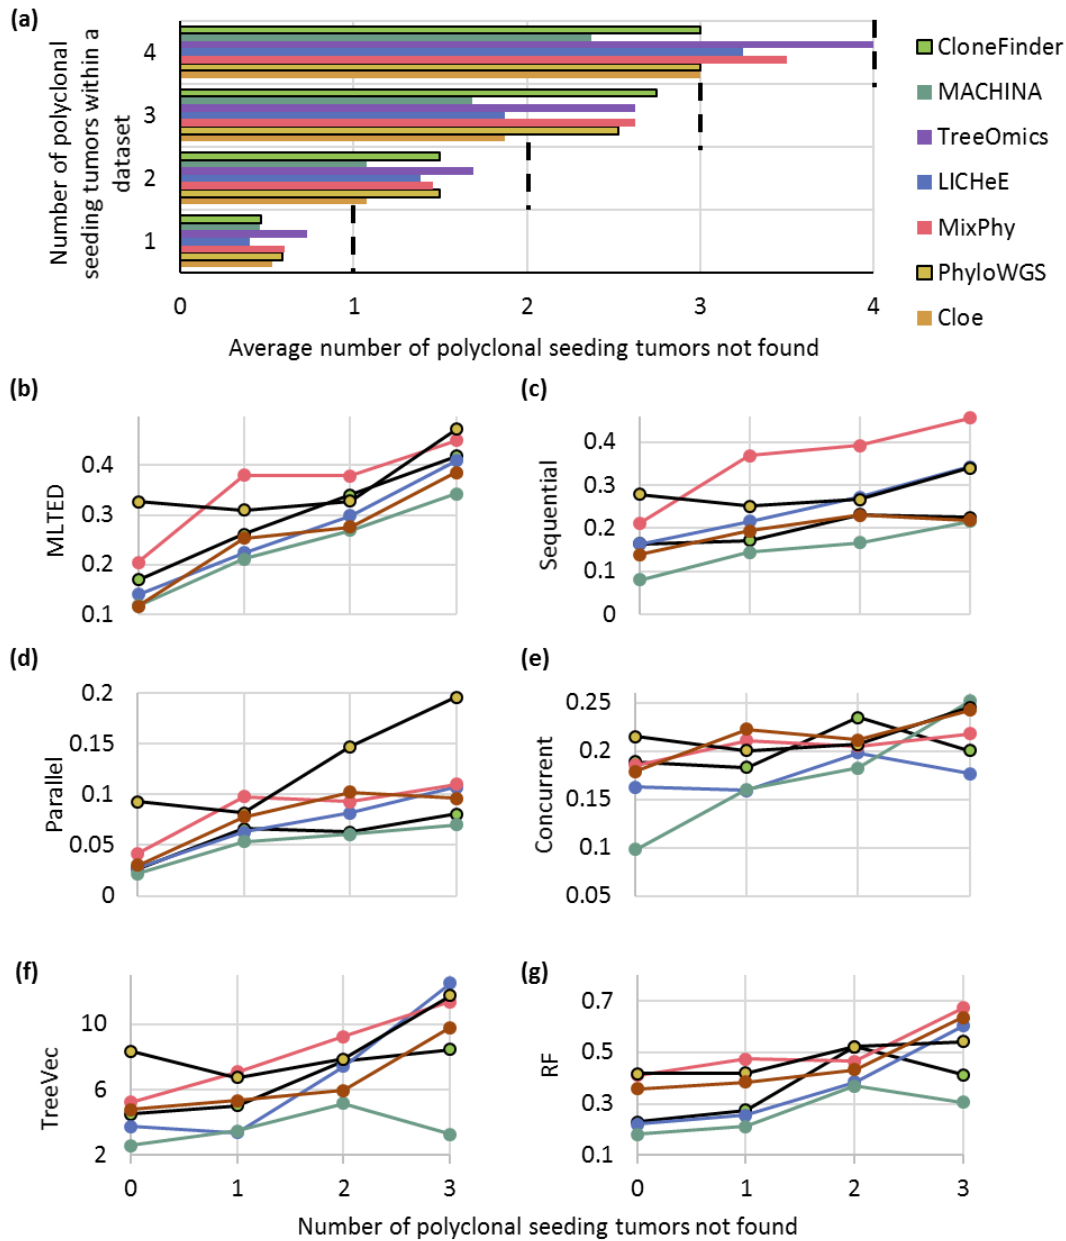

529

530 **Figure 7:** Accuracy of identifying different lineage clones within a tumor for the MA datasets. **(a)**

531 The average count of metastatic tumors with polyclonal seeding events that were not predicted.

532 **(b-g)** MLTED, error rates of ordering mutations, TreeVec, and RF distances. The x-axis for panels

533 **b-e** is the same as those in panels **f** and **g**. We excluded Cloe because its MLTED score was

534 very high, i.e., clone phylogenies were inaccurate.

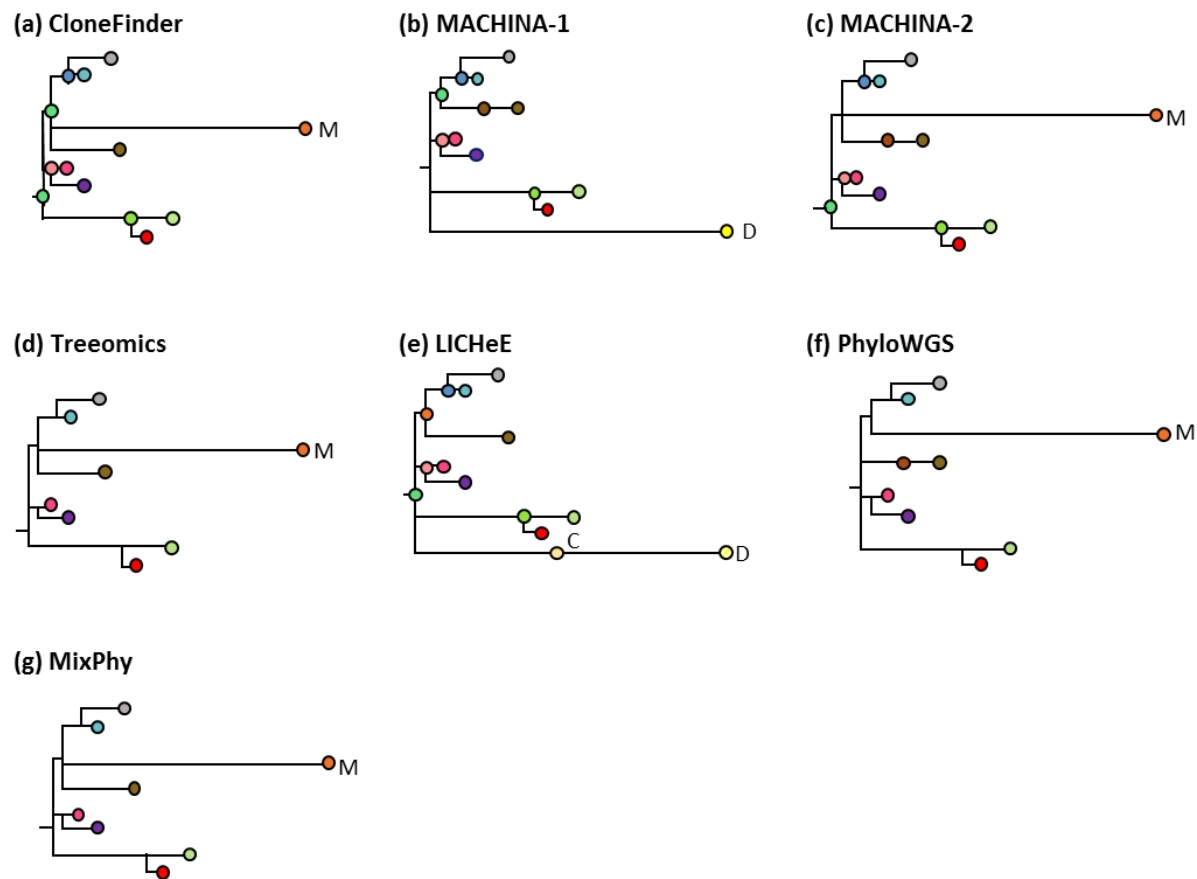

535

536 **Figure 8.** Clone phylogenies inferred by six methods (ClonE method was excluded due to error-  
537 prone) on an MA dataset. True clone phylogeny is given in **Figure 1g**. MACHINA produced two  
538 solutions (**b** and **c**). Inferred clones are annotated, and colors correspond to clones in **Figure 1g**.  
539 All the methods produced either clone lineage M or lineage C/D, which were found in the M5 tumor  
540 (**Fig. 1h**). The first solution of MACHINA (**b**) produced clone D, and LICHeE produced clones C  
541 and D (**e**). The other methods produced clone M.

542

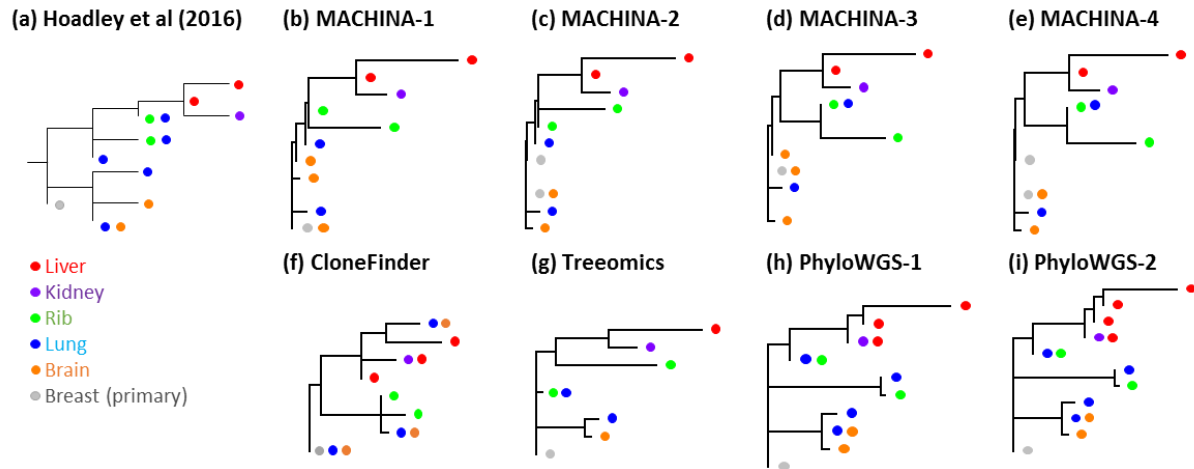

543

544 **Figure 9:** Empirical data analysis for the A7 dataset. The color of clones in the phylogeny  
545 corresponds to the location of clones' samples. (a) Clone phylogeny reported by Hoadley et al.  
546 (2016). (b-i) Inferred clone phylogenies by using (b-e) MACHINA, (f) CloneFinder, (g) Treeomics,  
547 and (h and i) PhyloWGS. MACHINA and PhyloWGS produced more than one phylogeny.

548

549

550 **Abbreviations**

551 SNV: single-nucleotide variant

552 VAF: variant allele frequency

553 CNV: copy number alteration

554 **Declarations**

555 **Ethics approval and consent to participate**

556 Not applicable.

557 **Consent for publication**

558 Not applicable.

559 **Availability of data and material**

560 The G7, G12, and P10 datasets are available on the website of the CloneFinder software  
561 (<https://github.com/gstecher/CloneFinderAPI>). The MA datasets and A7 dataset were obtained  
562 from the website of the MACHINA software (<https://github.com/raphael-group/machina>).

563 **Competing interests**

564 The authors declare that they have no competing interests.

565 **Funding**

566 This work was supported by National Institutes of Health to S.K. (LM012487) and S.M.  
567 (LM012758).

568 **Authors' contributions**



569 SK conceived the project. SM and SK designed analyses. SM, TV, JD, TB, and JC performed the  
570 analyses. SK, SM, and TV wrote the manuscript. All authors read and approved the final  
571 manuscript.

## 572 **Acknowledgments**

573 We thank Drs. Antonia Chroni, Heather Rowe, Louise A Huuki, Zachary Hanson-Hart, and Viriya  
574 Keo for critical comments and technical support.

## 575 **Additional files**

576 Additional file 1: **Table S1 and Figures S1-S3**. Supplementary table and figures. (PDF)

## 577 **References**

- 578 1. Watson IR, Takahashi K, Futreal PA, Chin L: **Emerging patterns of somatic mutations**  
579 **in cancer**. *Nat Rev Genet* 2013, **14**(10):703-718.
- 580 2. Martincorena I, Campbell PJ: **Somatic mutation in cancer and normal cells**. *Science*  
581 2015, **349**(6255):1483-1489.
- 582 3. Frank SA, Nowak MA: **Problems of somatic mutation and cancer**. *Bioessays* 2004,  
583 **26**(3):291-299.
- 584 4. Davis A, Gao R, Navin N: **Tumor evolution: Linear, branching, neutral or punctuated?**  
585 *Biochim Biophys Acta* 2017, **1867**(2):151-161.
- 586 5. McGranahan N, Swanton C: **Biological and therapeutic impact of intratumor**  
587 **heterogeneity in cancer evolution**. *Cancer Cell* 2015, **27**(1):15-26.
- 588 6. Gerlinger M, Rowan A, Horswell S, Larkin J, Endesfelder D, Gronroos E, Martinez P,  
589 Matthews N, Stewart A, Tarpey P *et al*: **Intratumor heterogeneity and branched**  
590 **evolution revealed by multiregion sequencing**. *N Engl J Med* 2012, **366**:883 - 892.
- 591 7. Marusyk A, Polyak K: **Tumor heterogeneity: causes and consequences**. *Biochim*  
592 *Biophys Acta* 2010, **1805**(1):105-117.
- 593 8. Dagogo-Jack I, Shaw AT: **Tumour heterogeneity and resistance to cancer therapies**.  
594 *Nat Rev Clin Oncol* 2018, **15**(2):81-94.
- 595 9. McGranahan N, Swanton C: **Clonal Heterogeneity and Tumor Evolution: Past,**  
596 **Present, and the Future**. *Cell* 2017, **168**(4):613-628.
- 597 10. Swanton C: **Intratumor heterogeneity: evolution through space and time**. *Cancer Res*  
598 2012, **72**(19):4875-4882.
- 599 11. Naxerova K, Jain RK: **Using tumour phylogenetics to identify the roots of metastasis**  
600 **in humans**. *Nat Rev Clin Oncol* 2015, **12**(5):258-272.
- 601 12. Greaves M, Maley C: **Clonal evolution in cancer**. *Nature* 2012, **481**:306 - 313.
- 602 13. El-Kebir M, Satas G, Raphael BJ: **Inferring parsimonious migration histories for**  
603 **metastatic cancers**. *Nat Genet* 2018, **50**(5):718-726.

- 604 14. Brown D, Smeets D, Szekely B, Larsimont D, Szasz AM, Adnet PY, Rothe F, Rouas G,  
605 Nagy ZI, Farago Z *et al*: **Phylogenetic analysis of metastatic progression in breast**  
606 **cancer using somatic mutations and copy number aberrations.** *Nat Commun* 2017,  
607 **8**:14944.
- 608 15. Zhao ZM, Zhao B, Bai Y, Iamarino A, Gaffney SG, Schlessinger J, Lifton RP, Rimm DL,  
609 Townsend JP: **Early and multiple origins of metastatic lineages within primary**  
610 **tumors.** *Proc Natl Acad Sci U S A* 2016, **113**(8):2140-2145.
- 611 16. Turajlic S, Xu H, Litchfield K, Rowan A, Chambers T, Lopez JI, Nicol D, O'Brien T, Larkin  
612 J, Horswell S *et al*: **Tracking Cancer Evolution Reveals Constrained Routes to**  
613 **Metastases: TRACERx Renal.** *Cell* 2018, **173**(3):581-594 e512.
- 614 17. Somarelli JA, Ware KE, Kostadinov R, Robinson JM, Amri H, Abu-Asab M, Fourie N,  
615 Diogo R, Swofford D, Townsend JP: **PhyloOncology: Understanding cancer through**  
616 **phylogenetic analysis.** *Biochim Biophys Acta Rev Cancer* 2017, **1867**(2):101-108.
- 617 18. Schwartz R, Schaffer AA: **The evolution of tumour phylogenetics: principles and**  
618 **practice.** *Nat Rev Genet* 2017, **18**(4):213-229.
- 619 19. Hong WS, Shpak M, Townsend JP: **Inferring the origin of metastases from cancer**  
620 **phylogenies.** *Cancer Res* 2015, **75**(19):4021-4025.
- 621 20. Macintyre G, Van Loo P, Corcoran NM, Wedge DC, Markowitz F, Hovens CM: **How**  
622 **subclonal modeling is changing the metastatic paradigm.** *Clin Cancer Res* 2017,  
623 **23**(3):630-635.
- 624 21. Kroigard AB, Larsen MJ, Brasch-Andersen C, Laenkholm AV, Knoop AS, Jensen JD, Bak  
625 M, Mollenhauer J, Thomassen M, Kruse TA: **Genomic Analyses of Breast Cancer**  
626 **Progression Reveal Distinct Routes of Metastasis Emergence.** *Sci Rep* 2017,  
627 **7**:43813.
- 628 22. Ullah I, Karthik GM, Alkodsai A, Kjallquist U, Stalhammar G, Lovrot J, Martinez NF,  
629 Lagergren J, Hautaniemi S, Hartman J *et al*: **Evolutionary history of metastatic breast**  
630 **cancer reveals minimal seeding from axillary lymph nodes.** *J Clin Invest* 2018,  
631 **128**(4):1355-1370.
- 632 23. Wang D, Niu X, Wang Z, Song CL, Huang Z, Chen KN, Duan J, Bai H, Xu J, Zhao J *et al*:  
633 **Multiregion Sequencing Reveals the Genetic Heterogeneity and Evolutionary**  
634 **History of Osteosarcoma and Matched Pulmonary Metastases.** *Cancer Res* 2019,  
635 **79**(1):7-20.
- 636 24. da Silva-Coelho P, Kroeze LI, Yoshida K, Koorenhof-Scheele TN, Knops R, van de Locht  
637 LT, de Graaf AO, Massop M, Sandmann S, Dugas M *et al*: **Clonal evolution in**  
638 **myelodysplastic syndromes.** *Nat Commun* 2017, **8**:15099.
- 639 25. Hunter KW, Amin R, Deasy S, Ha NH, Wakefield L: **Genetic insights into the morass of**  
640 **metastatic heterogeneity.** *Nat Rev Cancer* 2018, **18**(4):211-223.
- 641 26. Turajlic S, Xu H, Litchfield K, Rowan A, Horswell S, Chambers T, O'Brien T, Lopez JI,  
642 Watkins TBK, Nicol D *et al*: **Deterministic Evolutionary Trajectories Influence Primary**  
643 **Tumor Growth: TRACERx Renal.** *Cell* 2018, **173**(3):595-610 e511.
- 644 27. Nik-Zainal S, Van Loo P, Wedge DC, Alexandrov LB, Greenman CD, Lau KW, Raine K,  
645 Jones D, Marshall J, Ramakrishna M *et al*: **The life history of 21 breast cancers.** *Cell*  
646 2012, **149**(5):994-1007.
- 647 28. Cooper CS, Eeles R, Wedge DC, Van Loo P, Gundem G, Alexandrov LB, Kremeyer B,  
648 Butler A, Lynch AG, Camacho N *et al*: **Analysis of the genetic phylogeny of multifocal**  
649 **prostate cancer identifies multiple independent clonal expansions in neoplastic and**  
650 **morphologically normal prostate tissue.** *Nat Genet* 2015, **47**(4):367-372.

- 651 29. Stachler MD, Taylor-Weiner A, Peng S, McKenna A, Agoston AT, Odze RD, Davison JM,  
652 Nason KS, Loda M, Leshchiner I *et al*: **Paired exome analysis of Barrett's esophagus**  
653 **and adenocarcinoma**. *Nat Genet* 2015, **47**(9):1047-1055.
- 654 30. Hoadley KA, Siegel MB, Kanchi KL, Miller CA, Ding L, Zhao W, He X, Parker JS, Wendl  
655 MC, Fulton RS *et al*: **Tumor Evolution in Two Patients with Basal-like Breast Cancer:**  
656 **A Retrospective Genomics Study of Multiple Metastases**. *PLoS Med* 2016,  
657 **13**(12):e1002174.
- 658 31. Gawad C, Koh W, Quake SR: **Single-cell genome sequencing: current state of the**  
659 **science**. *Nat Rev Genet* 2016, **17**(3):175-188.
- 660 32. Navin NE: **The first five years of single-cell cancer genomics and beyond**. *Genome*  
661 *Res* 2015, **25**(10):1499-1507.
- 662 33. Vandin F: **Computational methods for characterizing cancer mutational**  
663 **heterogeneity**. *Front Genet* 2017, **8**:83.
- 664 34. Popic V, Salari R, Hajirasouliha I, Kashef-Haghighi D, West RB, Batzoglou S: **Fast and**  
665 **scalable inference of multi-sample cancer lineages**. *Genome Biol* 2015, **16**(1):91.
- 666 35. Miura S, Gomez K, Murillo O, Huuki LA, Vu T, Buturla T, Kumar S: **Predicting clone**  
667 **genotypes from tumor bulk sequencing of multiple samples**. *Bioinformatics* 2018,  
668 **34**(23):4017-4026.
- 669 36. Reiter JG, Makohon-Moore AP, Gerold JM, Bozic I, Chatterjee K, Iacobuzio-Donahue CA,  
670 Vogelstein B, Nowak MA: **Reconstructing metastatic seeding patterns of human**  
671 **cancers**. *Nat Commun* 2017, **8**:14114.
- 672 37. Deshwar AG, Vembu S, Yung CK, Jang GH, Stein L, Morris Q: **PhyloWGS:**  
673 **reconstructing subclonal composition and evolution from whole-genome**  
674 **sequencing of tumors**. *Genome Biol* 2015, **16**:35.
- 675 38. Hujdurovic A, Kacar U, Milanic M, Ries B, Tomescu AI: **Complexity and Algorithms for**  
676 **Finding a Perfect Phylogeny from Mixed Tumor Samples**. *IEEE/ACM Trans Comput*  
677 *Biol Bioinform* 2018, **15**(1):96-108.
- 678 39. Marass FM, Florent; Yuan, Ke; Rosenfeld, Nitzan; Markowitz, Florian: **A phylogenetic**  
679 **latent feature model for clonal deconvolution**. *Ann Appl Stat* 2016, **10**(4):2377--2404.
- 680 40. Um SW, Joung JG, Lee H, Kim H, Kim KT, Park J, Hayes DN, Park WY: **Molecular**  
681 **Evolution Patterns in Metastatic Lymph Nodes Reflect the Differential Treatment**  
682 **Response of Advanced Primary Lung Cancer**. *Cancer Res* 2016, **76**(22):6568-6576.
- 683 41. Gundem G, Van Loo P, Kremeyer B, Alexandrov LB, Tubio JM, Papaemmanuil E, Brewer  
684 DS, Kallio HM, Hognas G, Annala M *et al*: **The evolutionary history of lethal metastatic**  
685 **prostate cancer**. *Nature* 2015, **520**(7547):353-357.
- 686 42. Yang H, Lu B, Lai LH, Lim AH, Alvarez JJS, Zhai W: **PSiTE: a Phylogeny guided**  
687  **Simulator for Tumor Evolution**. *Bioinformatics* 2019.
- 688 43. Davis A, Navin NE: **Computing tumor trees from single cells**. *Genome Biol* 2016,  
689 **17**(1):113.
- 690 44. Gerlinger M, Horswell S, Larkin J, Rowan AJ, Salm MP, Varela I, Fisher R, McGranahan  
691 N, Matthews N, Santos CR *et al*: **Genomic architecture and evolution of clear cell renal**  
692 **cell carcinomas defined by multiregion sequencing**. *Nat Genet* 2014, **46**(3):225-233.
- 693 45. Ling S, Hu Z, Yang Z, Yang F, Li Y, Lin P, Chen K, Dong L, Cao L, Tao Y *et al*: **Extremely**  
694 **high genetic diversity in a single tumor points to prevalence of non-Darwinian cell**  
695 **evolution**. *Proc Natl Acad Sci U S A* 2015, **112**(47):E6496-6505.
- 696 46. Mallick S, McPherson AW, Donmez N, Sahinalp CS: **Clonality inference in multiple**  
697 **tumor samples using phylogeny**. *Bioinformatics* 2015, **31**(9):1349-1356.

- 698 47. Sengupta S, Wang J, Lee J, Muller P, Gulukota K, Banerjee A, Ji Y: **Bayclone: Bayesian**  
699 **nonparametric inference of tumor subclones using NGS data.** *Pac Symp Biocomput*  
700 2015:467-478.
- 701 48. Zare H, Wang J, Hu A, Weber K, Smith J, Nickerson D, Song C, Witten D, Blau CA, Noble  
702 WS: **Inferring clonal composition from multiple sections of a breast cancer.** *PLoS*  
703 *Comput Biol* 2014, **10**(7):e1003703.
- 704 49. Jiang Y, Qiu Y, Minn AJ, Zhang NR: **Assessing intratumor heterogeneity and tracking**  
705 **longitudinal and spatial clonal evolutionary history by next-generation sequencing.**  
706 *Proc Natl Acad Sci U S A* 2016, **113**(37):E5528-5537.
- 707 50. Fischer A, Vazquez-Garcia I, Illingworth CJ, Mustonen V: **High-definition reconstruction**  
708 **of clonal composition in cancer.** *Cell Rep* 2014, **7**(5):1740-1752.
- 709 51. El-Kebir M, Oesper L, Acheson-Field H, Raphael BJ: **Reconstruction of clonal trees**  
710 **and tumor composition from multi-sample sequencing data.** *Bioinformatics* 2015,  
711 **31**(12):i62-i70.
- 712 52. Strino F, Parisi F, Micsinai M, Kluger Y: **TrAp: a tree approach for fingerprinting**  
713 **subclonal tumor composition.** *Nucleic Acids Res* 2013.
- 714 53. Roth A, Khattra J, Yap D, Wan A, Laks E, Biele J, Ha G, Aparicio S, Bouchard-Cote A,  
715 Shah SP: **PyClone: statistical inference of clonal population structure in cancer.** *Nat*  
716 *Methods* 2014, **11**(4):396-398.
- 717 54. Miller CA, White BS, Dees ND, Griffith M, Welch JS, Griffith OL, Vij R, Tomasson MH,  
718 Graubert TA, Walter MJ *et al.* **SciClone: Inferring Clonal Architecture and Tracking**  
719 **the Spatial and Temporal Patterns of Tumor Evolution.** *PLoS Comput Biol* 2014,  
720 **10**(8):e1003665.
- 721 55. Jahn K, Kuipers J, Beerenwinkel N: **Tree inference for single-cell data.** *Genome Biol*  
722 2016, **17**:86.
- 723 56. Miura S, Huuki LA, Buturla T, Vu T, Gomez K, Kumar S: **Computational enhancement**  
724 **of single-cell sequences for inferring tumor evolution.** *Bioinformatics* 2018,  
725 **34**(17):i917-i926.
- 726 57. Kuhn HWT, A. W.: **Nonlinear programming.** In: *Proceedings of the Second Berkeley*  
727 *Symposium on Mathematical Statistics and Probability, 1950.* 1951: 481--492.
- 728 58. Karpov NM, S.; Rahman, K.; Sahinalp, S.C.: **A Multi-labeled Tree Edit Distance for**  
729 **Comparing "Clonal Trees" of Tumor Progression.** In: *18th International Workshop on*  
730 *Algorithms in Bioinformatics (WABI 2018).* Volume 113, edn. Edited by Parida LU, E.  
731 Dagstuhl, Germany: Schloss Dagstuhl--Leibniz-Zentrum fuer Informatik; 2018.
- 732 59. Kendall M, Eldholm V, Colijn C: **Comparing phylogenetic trees according to tip label**  
733 **categories.** *bioRxiv* 2018:251710.
- 734 60. Nei M, Kumar S: **Molecular evolution and phylogenetics.** Oxford ; New York: Oxford  
735 University Press; 2000.
- 736 61. Kumar S, Stecher G, Peterson D, Tamura K: **MEGA-CC: Computing Core of Molecular**  
737 **Evolutionary Genetics Analysis program for automated and iterative data analysis.**  
738 *Bioinformatics* 2012, **28**:2685-2686
- 739 62. Kuhner MK, Yamato J: **Practical performance of tree comparison metrics.** *Syst Biol*  
740 2015, **64**(2):205-214.
- 741 63. Kendall M, Colijn C: **Mapping Phylogenetic Trees to Reveal Distinct Patterns of**  
742 **Evolution.** *Mol Biol Evol* 2016, **33**(10):2735-2743.
- 743 64. Jombart T, Kendall M, Almagro-Garcia J, Colijn C: **treospace: Statistical exploration of**  
744 **landscapes of phylogenetic trees.** *Mol Ecol Resour* 2017, **17**(6):1385-1392.
- 745 65. Robinson DF, Foulds LR: **Comparison of Phylogenetic Trees.** *Mathematical*  
746 *Biosciences* 1981, **53**(1-2):131-147.

- 747 66. Wen D, Yu Y, Zhu J, Nakhleh L: **Inferring Phylogenetic Networks Using PhyloNet**. *Syst*  
748 *Biol* 2018, **67**(4):735-740.  
749
